# Supplementary material for: A Novel Microglia-Specific Transcriptional Signature Correlates With Behavioral Deficits in Neuropsychiatric Lupus
Source: PubMed Central journal article supplement (PMC7055359; doi:10.3389/fimmu.2020.00230), 2020-02-26
Supplement: Data_Sheet_1.pdf [file Data_Sheet_1.pdf]

## *Supplementary Material*

### **1 Supplementary Materials and Methods**

#### **Fluorescein Angiography.**

Mice were anesthetized via intraperitoneal delivery of ketamine (90 mg/kg, Akron, Lake Forest, IL)/xylazine (12 mg/kg, Akorn) cocktail. Eyes were anesthetized with 1 drop of 0.5% tetracaine (Alcon, Fort Worth, TX). Pupils were dilated with 1 drop of 2.5% phenylephrine (Akorn) and 0.5% tropicamide (Akorn). Whiskers were trimmed with scissors. A subcutaneous injection of meloxicam (1 mg/kg, Henry Schein Animal Health, Melville, NY) was given for pain control. Fluorescein (0.03-0.05 ml, 100 mg/ml, Akorn) was injected into the tail vein. The fundus was imaged using the Micron3 fundus camera (Phoenix Technology Group, Pleasanton, CA). After imaging, mice given ophthalmic ointment (Akorn) and placed in a heated recovery cage.

#### **Histopathology and Immunohistochemistry.**

Animals were sacrificed and perfused using 4% paraformaldehyde in PBS, brains were excised and fixed in 4% paraformaldehyde. Fixed brains were sent to the Northwestern University Mouse Histology & Phenotyping Laboratory for further processing. Briefly, paraffin-embedded brain sections (4  $\mu$ m) were stained with anti-mouse CD45. All images were photographed at X2 and X10 using an Olympus BX41 microscope equipped with an Olympus DP21 camera. Slides were used for qualitative and not quantitative purposes and were thus not scored by a pathologist.

## 2 Supplementary Figures

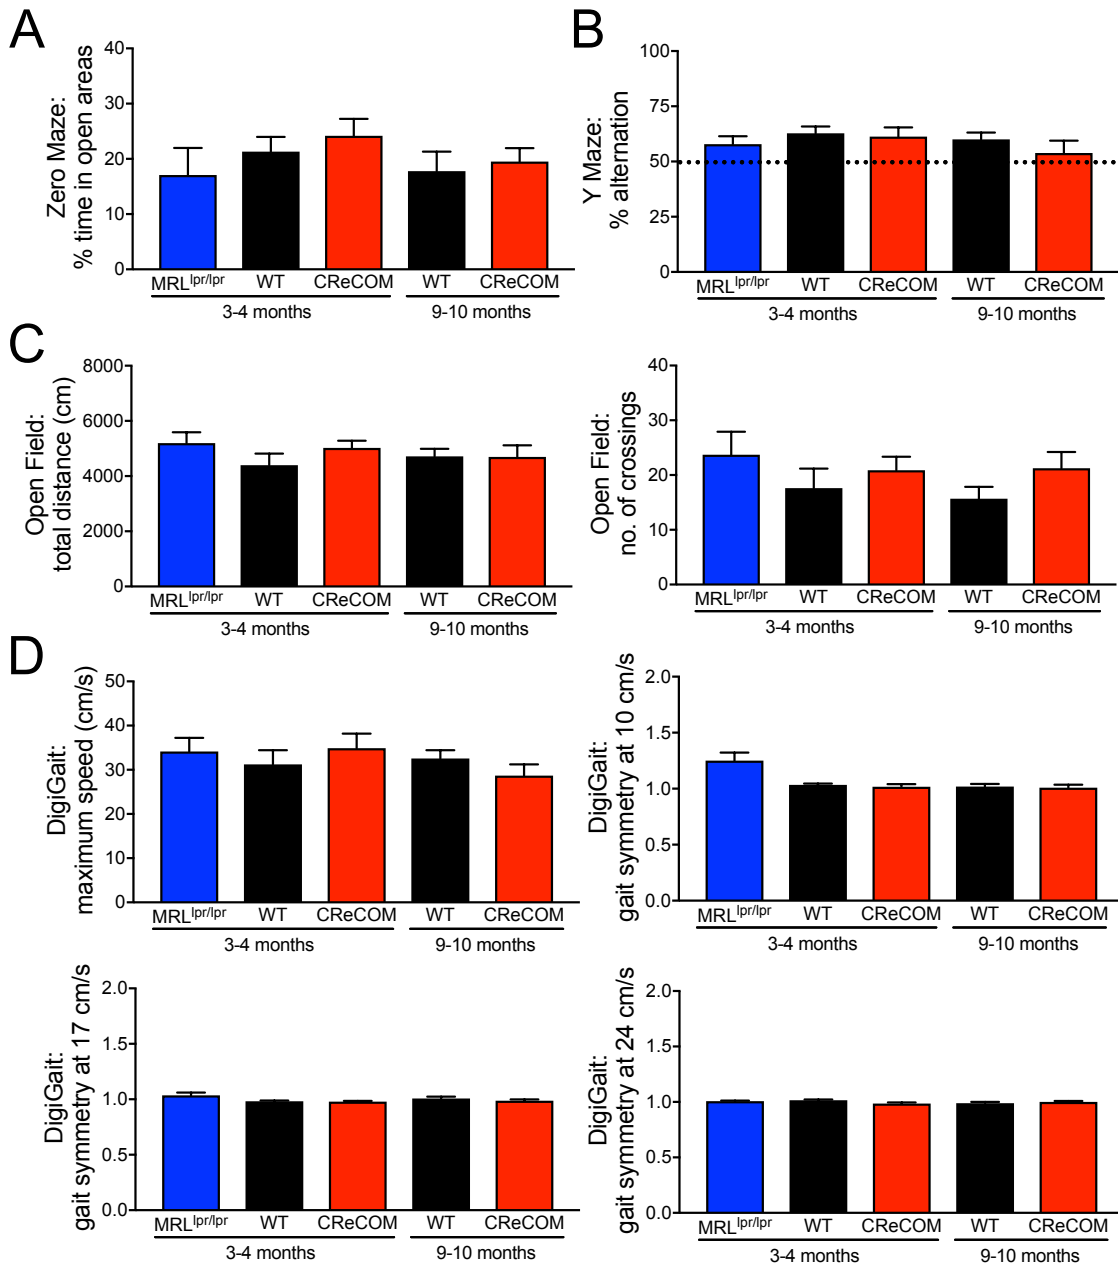

**Supplemental Figure 1. CReCOM mice exhibit similar anxiety levels, alternation, activity levels and gait to WT mice.** 3-4-month-old female MRL<sup>lpr/lpr</sup> (n=7), WT (n=9), and CReCOM (n=8) and 9-10-month-old WT (n=9) and CReCOM (n=9) mice underwent behavioral testing. Data are combined from 3 independent experiments. (A) Zero maze: % time spent in open areas. (B) Y maze: % alternation. (C) Open field: total distance travelled and number of crossing across the arena. (D) DigiGait: maximum speed that the animals could maintain and gait symmetry at 10, 17 and 24 cm/s.

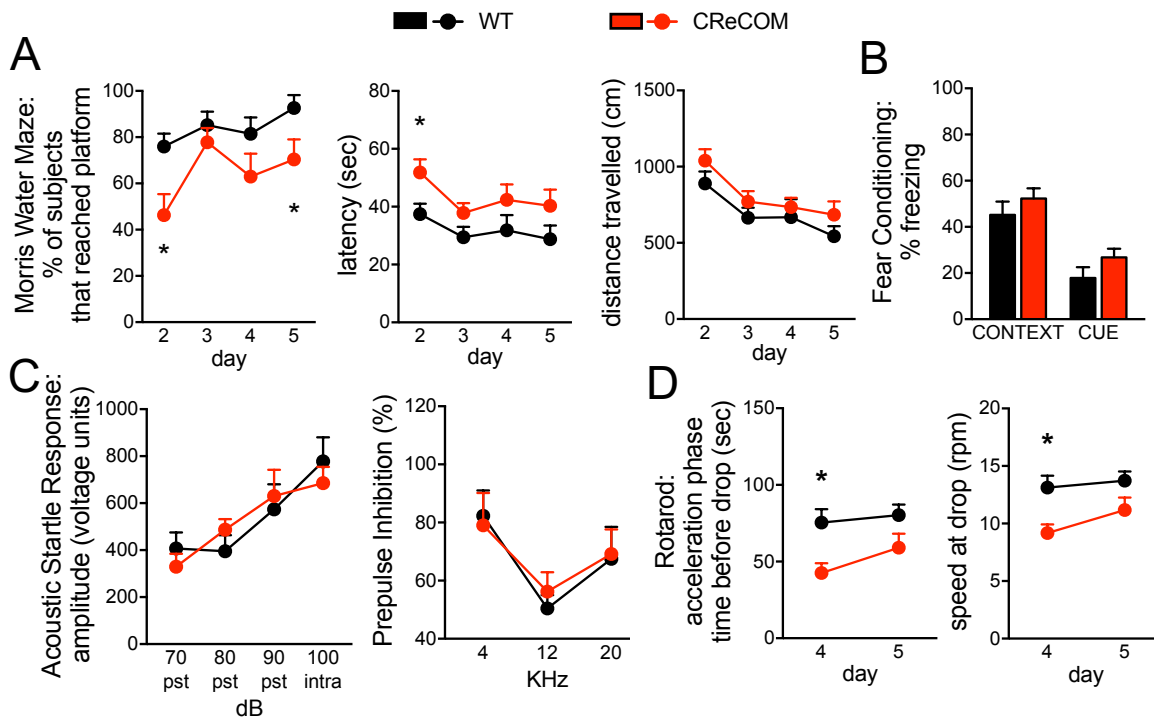

**Supplemental Figure 2. Behavioral deficits persist in aged CReCOM mice.** 9-10-month-old female WT (n=9) and CReCOM (n=9) mice underwent behavioral testing. Data are combined from 3 independent experiments. (A) Morris water maze: % of mice that reached the hidden platform, latency to platform and distance travelled. (B) Fear conditioning: % freezing following reintroduction of “shock” environment (CONTEXT) or tone associated with “shock” (CUE). (C) Prepulse inhibition: amplitude of acoustic startle response at 70, 80, 90, and 100 dB and % prepulse inhibition at 4, 12, and 20 KHz frequencies. (D) Rotarod: time spent on rod prior to drop and speed at drop during acceleration phase. (\*,  $p < 0.05$ ).

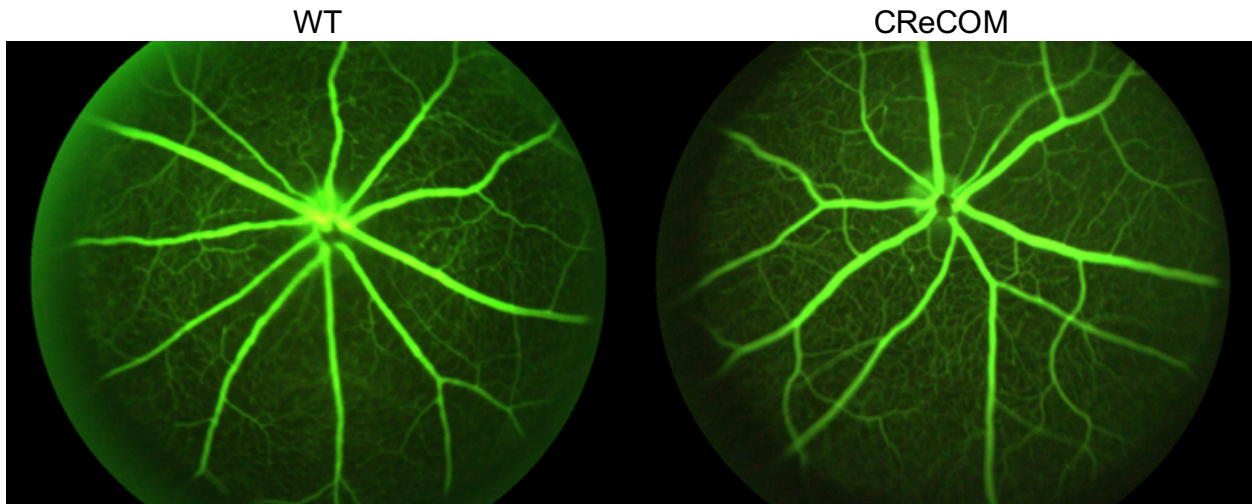

**Supplemental Figure 3. CReCOM mice do not exhibit vascular ischemia or leakage in the retina.** 11-12-month-old female WT (n=5) and CReCOM (n=5) mice underwent fluorescein angiography. Representative images are shown.

# CReCOM

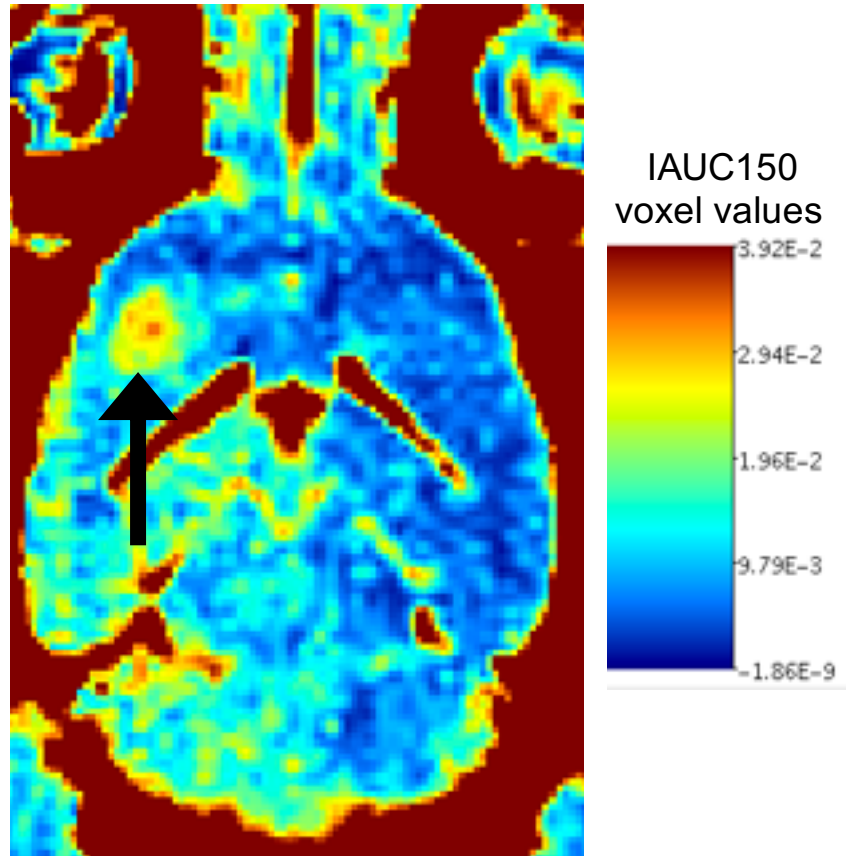

**Supplemental Figure 4. Presence of a lesion in a CReCOM mouse.** 4-month-old female  $MRL^{lpr/lpr}$  (n=4) and 12-month-old WT (n=4) and CReCOM (n=4) mice underwent dynamic contrast-enhanced MRI. Shown is a representative IAUC150 map of one of the CReCOM mice. Black arrow indicates a large lesion.

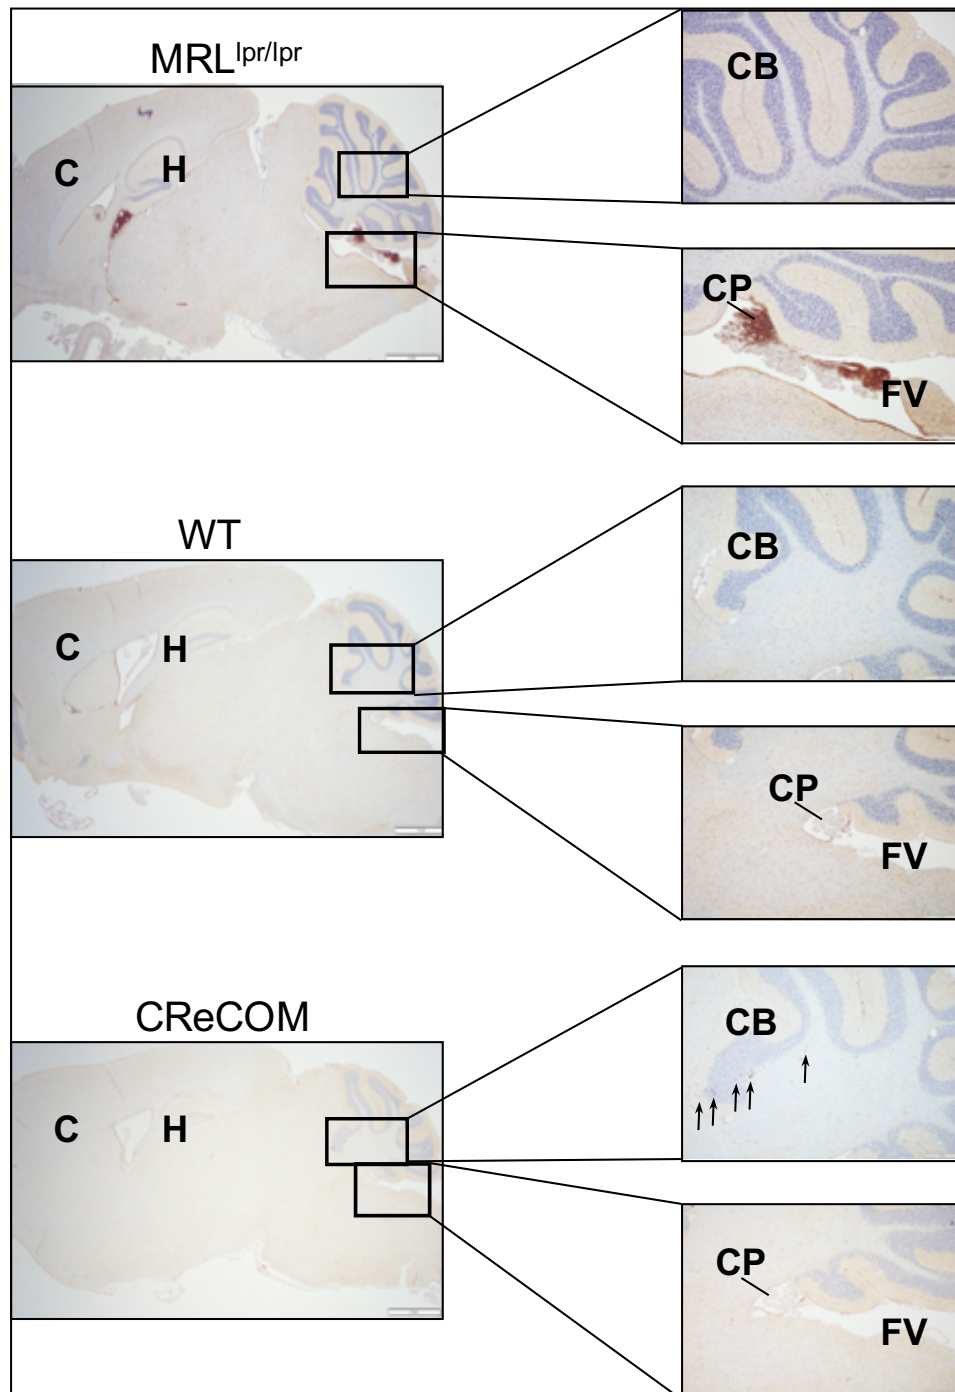

**Supplemental Figure 5. Histological evidence of diffuse infiltration in CReCOM brain parenchyma, but not the choroid plexus.** 4-month-old female MRL<sup>lpr/lpr</sup> (n=2) and 12-month-old WT (n=2) and CReCOM (n=2) mice were perfused with 4% paraformaldehyde in PBS. Brains were extracted, paraffin-embedded and sequentially sliced along the sagittal plane. Sections (4  $\mu$ m) were stained with an antibody specific for mouse CD45. Images shown on the left were taken at a 20X magnification with an exposure time of 66.7 microsecond. Images on the right were taken at a 100X magnification with an exposure time of 156.3 microsecond. Black arrows denote CD45 positivity in the cerebellum. C-cortex; H-hippocampus; CB; cerebellum; CP-choroid plexus; FV-fourth ventricle.

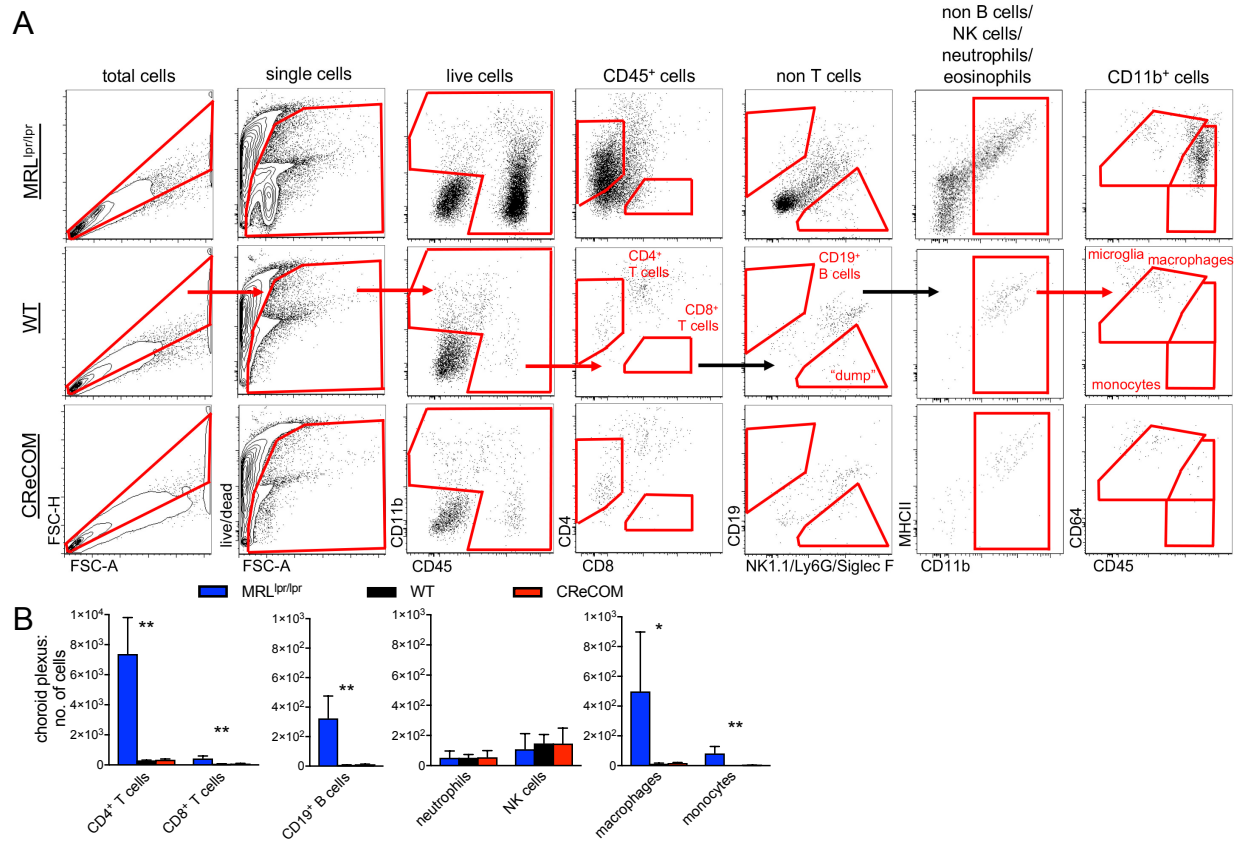

**Supplemental Figure 6. CReCOM mice do not show evidence of choroid plexus infiltration.** The choroid plexuses of 3-4-month-old female MRL<sup>lpr/lpr</sup> (n=5) and 9-11-month-old WT (n=7) and CReCOM (n=7) mice were isolated and analyzed by flow cytometry. Data are combined from 2 independent experiments. **(A)** Choroid plexus gating strategy. **(B)** Quantitative analysis of cell populations in the choroid plexus. (\*, p<0.05; \*\*, p<0.005).

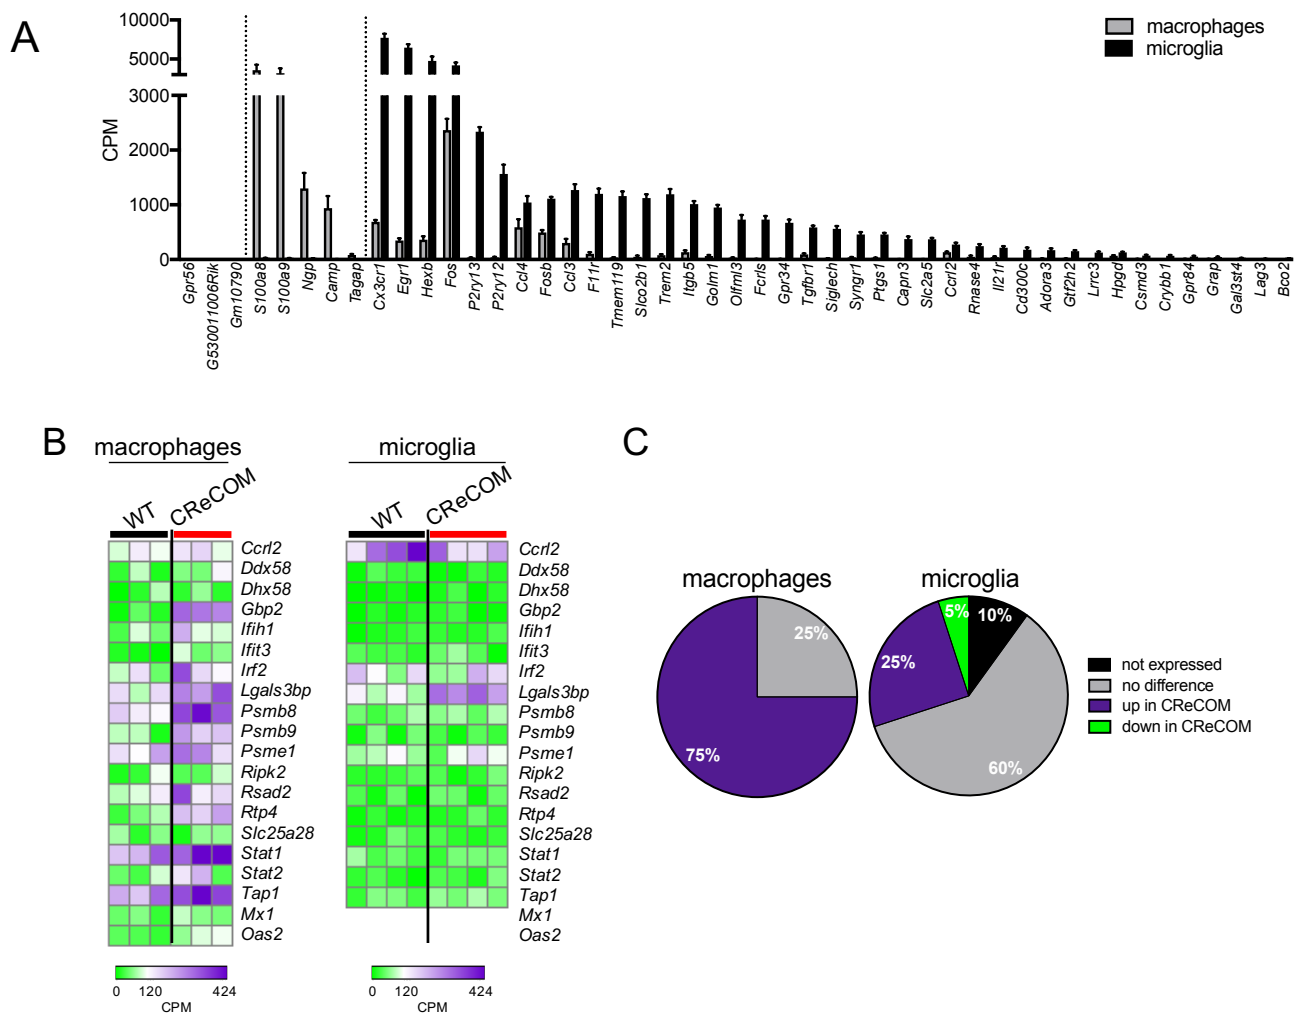

**Supplemental Figure 7. Microglia express microglia-specific genes but do not exhibit an IFN signature.** FACS-purified CD11b<sup>+</sup>CD64<sup>+</sup>CD45<sup>hi</sup> macrophages of 11-12-month-old female WT (n=3) and CReCOM (n=3) mice and CD11b<sup>+</sup>CD64<sup>+</sup>CD45<sup>lo</sup> microglia of 11-12-month-old female WT (n=4) and CReCOM (n=4) mice were analyzed by RNA-seq. (A) Expression values (counts per million=CPM) for 47 known microglial genes in macrophages and microglia. Values shown are combined from WT and CReCOM samples. (B) Heat maps of CPM values for 20 IFN response genes for both macrophages and microglia. (C) Pie charts allocating 20 IFN response genes into groups based on CReCOM expression level compared to WT.



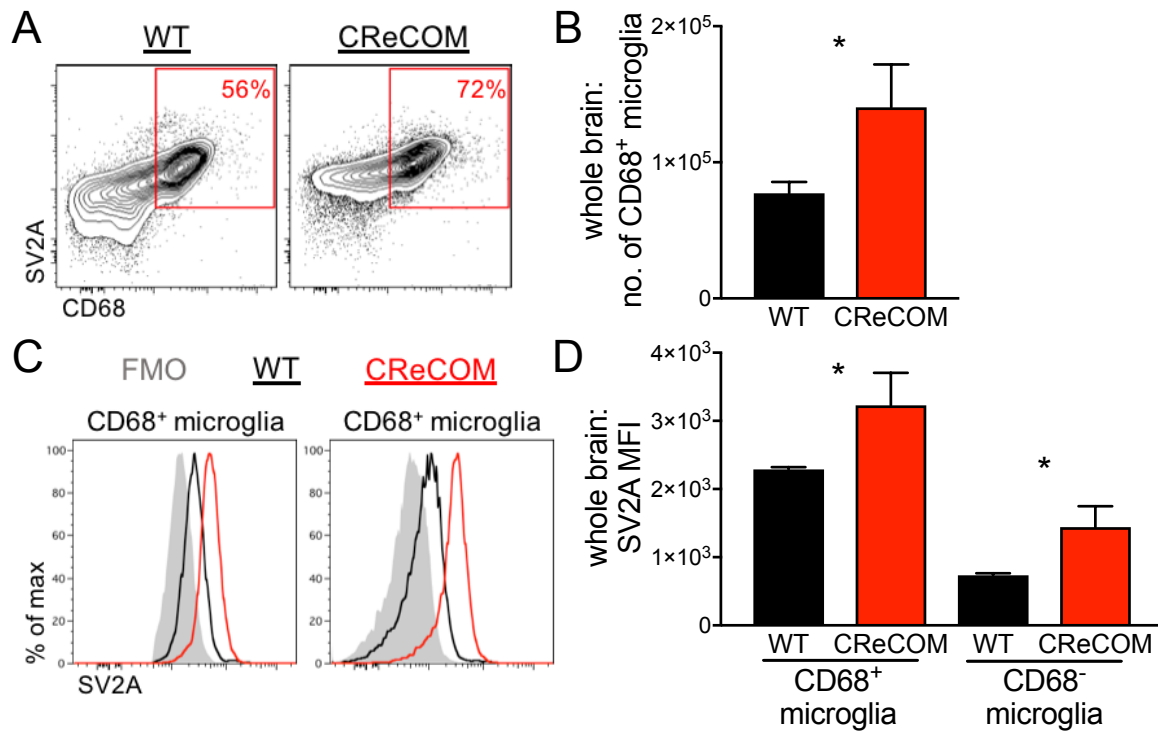

**Supplemental Figure 8. CReCOM microglia are more activated and show increased uptake of synaptic material.** Brains of 9-11-month-old female WT (n=3) and CReCOM (n=4) mice were analyzed by flow cytometry. CD11b<sup>+</sup>CD64<sup>+</sup>CD45<sup>lo</sup> microglia were gated on for subsequent analysis. Data are representative of 2 independent experiments. (A) Representative plots of SV2A and CD68 expression. (B) Quantitation of CD68<sup>+</sup> microglia. (C) Representative histogram of intracellular SV2A in CD68<sup>+</sup> and CD68<sup>-</sup> microglia. Fluorescence minus one (FMO) is presented as a negative control. (D) Quantitation of SV2A expression in CD68<sup>+</sup> and CD68<sup>-</sup> microglia.

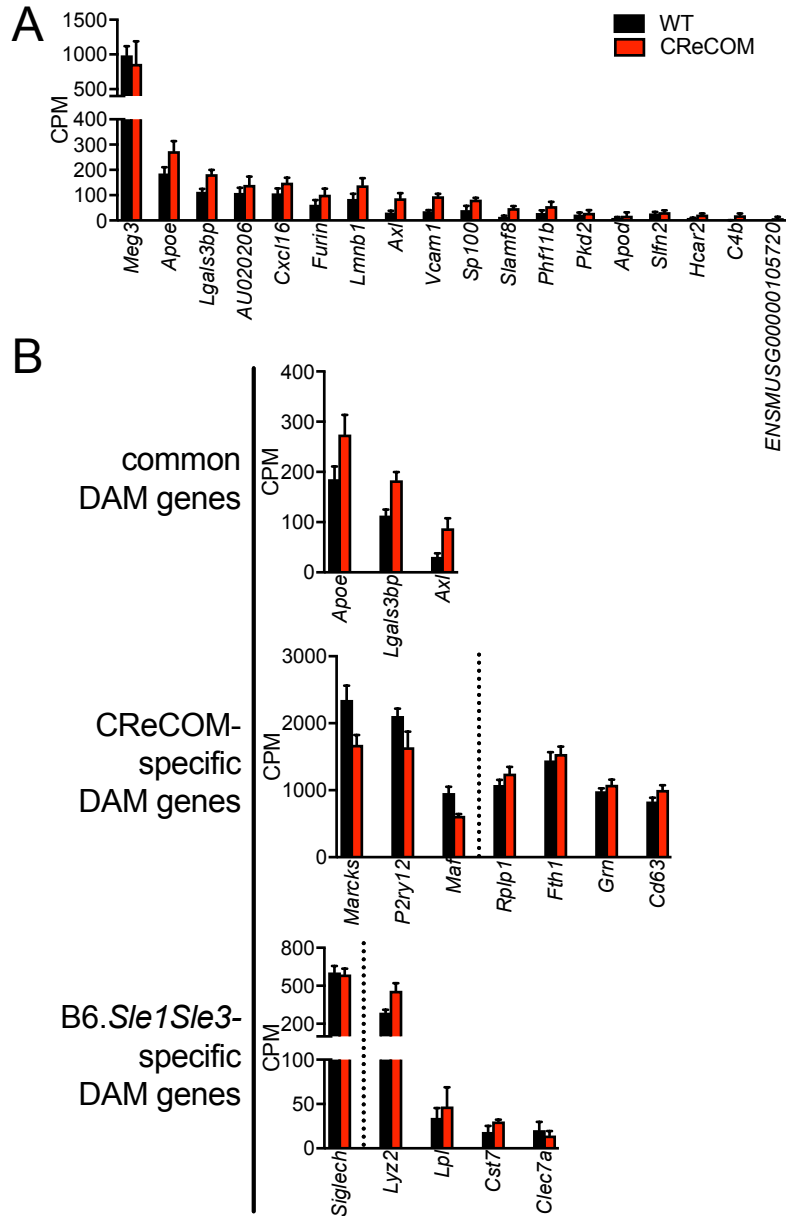

**Supplemental Figure 9. Microglia from the 3-4-month-old cohort exhibit similar expression patterns of ‘NP-SLE’ and ‘DAM’ signatures as the 9-10-month-old cohort.** FACS-purified CD11b<sup>+</sup>CD64<sup>+</sup>CD45<sup>lo</sup> microglia of 5-6-month-old female WT (n=4) and CReCOM (n=4) mice were analyzed by RNA-seq. Expression values (CPM) for (A) ‘NP-SLE’ and (B) ‘DAM’ signatures.

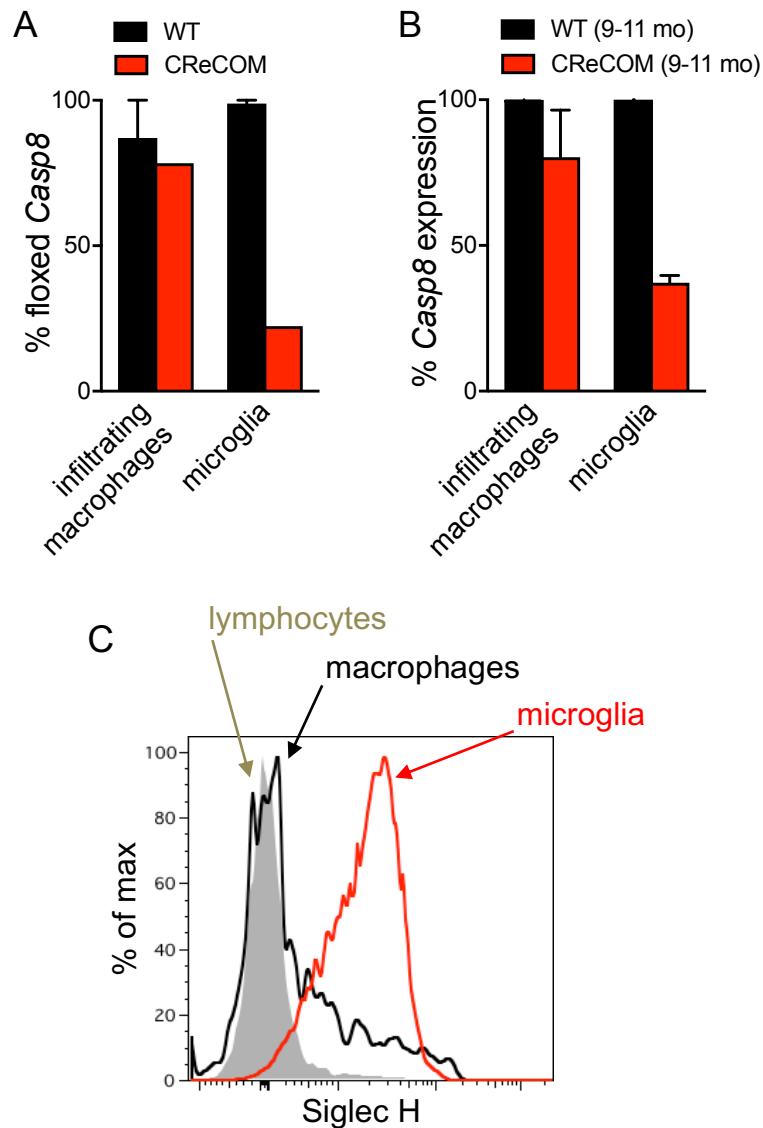

**Supplemental Figure 10. Brain infiltrating macrophage and microglial expression of Siglec H and caspase-8.** (A) CD11b<sup>+</sup>CD64<sup>+</sup>CD45<sup>hi</sup> macrophages and CD11b<sup>+</sup>CD64<sup>+</sup>CD45<sup>lo</sup> microglia were FACS-purified from 9-11-month-old female WT (n=2) and CReCOM (n=2) mice. DNA was analyzed for the presence of the caspase-8 floxed allele. Data are presented as % floxed and are derived as follows: divide the level of the floxed allele from a CReCOM-sorted population by the level of the floxed allele from the WT-sorted population and convert the resulting value into %. (B) FACS-purified CD11b<sup>+</sup>CD64<sup>+</sup>CD45<sup>hi</sup> macrophages of 11-12-month-old female WT (n=3) and CReCOM (n=3) mice and CD11b<sup>+</sup>CD64<sup>+</sup>CD45<sup>lo</sup> microglia of 11-12-month-old female WT (n=4) and CReCOM (n=4) mice were subjected to Quantseq 3' biased RNA-seq protocol. Data are presented as % *Casp8* expression and are derived as follows: divide the CPM from a CReCOM-sorted population by the CPM from the WT-sorted population and convert the resulting value into %. (C) Brains of 9-11-month-old female WT (n=4) and CReCOM (n=4) mice were analyzed by flow cytometry. Expression of Siglec H on CD4<sup>+</sup>CD8<sup>+</sup>CD19<sup>+</sup> lymphocytes (gray-filled), CD11b<sup>+</sup>CD64<sup>+</sup>CD45<sup>hi</sup> macrophages (black line), and CD11b<sup>+</sup>CD64<sup>+</sup>CD45<sup>lo</sup> microglia (red line).

**Supplemental Figure 11. List of antibodies utilized for brain flow cytometric analysis.**

| <b>Antigen</b> | <b>Clone</b> | <b>Fluorochrome</b> | <b>Manufacturer</b> |
|----------------|--------------|---------------------|---------------------|
| CD45           | 30-F11       | FITC                | eBioscience         |
| CD19           | 1D3          | PE                  | BD Biosciences      |
| MHC II         | M5/114.15.2  | PerCP-Cy5.5         | Biolegend           |
| CD68           | FA-11        | PerCP-Cy5.5         | Biolegend           |
| CD8            | 53-6.7       | efluor 450          | eBioscience         |
| CD4            | RM4-5        | Alexa700            | BD Biosciences      |
| CD11b          | M1/70        | APC-Cy7             | BD Biosciences      |
| Siglec H       | eBio440c     | PE-Cy7              | Invitrogen          |
| Ly6G           | 1A8          | PE-CF594            | BD Biosciences      |
| NK1.1          | PK136        | PE-CF594            | BD Biosciences      |
| Siglec F       | E50-2440     | PE-CF594            | BD Biosciences      |
| CD64           | X54-5/7.1    | APC                 | Biolegend           |
| SV2A           | polyclonal   | Alexa647            | Bioss               |

**Supplemental Figure 12. Parameters for macrophage (11-12-month-old) sample exclusion.**

| Sample           | Spleen Weight (mg) | Cervical Lymph Node Weight (mg) | cDNA library (pg/mL) | # Untrimmed Reads | %                                 |                     | Reason for Exclusion                                                    |
|------------------|--------------------|---------------------------------|----------------------|-------------------|-----------------------------------|---------------------|-------------------------------------------------------------------------|
|                  |                    |                                 |                      |                   | Uniquely Mapped Reads (alignment) | Unmapped: Too Short |                                                                         |
| C8_O_F1_MAC      | 77.3               | 15.4                            | 449                  | 11,501,116        | 60.24%                            | 23.56%              | histogram                                                               |
| C8_O_F2_MAC      | 76.3               | 14.3                            | 1450                 | 14,556,822        | 66.50%                            | 16.64%              |                                                                         |
| C8_O_F3_MAC      | 75.3               | 13                              |                      |                   |                                   |                     | insufficient RNA                                                        |
| C8_O_F4_MAC      | 83.7               | 17.9                            | 1680                 | 9,289,974         | 69.00%                            | 16.56%              |                                                                         |
| C8_O_F5_MAC      | 73.3               | 18.3                            |                      |                   |                                   |                     | insufficient RNA                                                        |
| C8_O_F6_MAC      | 68.7               | 13.4                            | 774                  | 11,701,518        | 43.67%                            | 45.05%              | behavior/ sorter error/ 43.67% alignment/ histogram/ high % unmapped    |
| C8_O_F7_MAC      | 99                 | 15.5                            | 278                  | 11,012,854        | 63.89%                            | 21.12%              |                                                                         |
| CD11cC8_O_F1_MAC | 171.9              | 204.5                           | 1740                 | 18,224,423        | 66.72%                            | 16.77%              |                                                                         |
| CD11cC8_O_F2_MAC | 147.2              | 38.6                            | 942                  | 12,132,134        | 64.13%                            | 19.32%              | mouse (low spleen and cervical lymph node weights)/ histogram           |
| CD11cC8_O_F3_MAC | 380                | 301.4                           | 2500                 | 15,701,172        | 65.81%                            | 19.08%              |                                                                         |
| CD11cC8_O_F4_MAC | 223.7              | 168.1                           | 741                  | 10,807,502        | 64.63%                            | 20.26%              |                                                                         |
| CD11cC8_O_F5_MAC | 114                | 111.8                           | 649                  | 13,814,153        | 55.33%                            | 28.83%              | mouse (low spleen weight)/ 55.33% alignment/ histogram/ high % unmapped |

**Supplemental Figure 13. Parameters for microglia (5-6-month-old) sample exclusion.**

| Sample           | Spleen Weight (mg) | Cervical Lymph Node Weight (mg) | cDNA library (pg/mL) | # Untrimmed Reads | %                                 |                     | Reason for Exclusion                                                           |
|------------------|--------------------|---------------------------------|----------------------|-------------------|-----------------------------------|---------------------|--------------------------------------------------------------------------------|
|                  |                    |                                 |                      |                   | Uniquely Mapped Reads (alignment) | Unmapped: Too Short |                                                                                |
| C8_Y_F1_MIC      | 70.5               | 10.1                            | 1370                 | 8913743           | 80.81%                            | 5.85%               |                                                                                |
| C8_Y_F2_MIC      | 87.2               | 12                              | 1030                 | 7425062           | 79.56%                            | 7.09%               |                                                                                |
| C8_Y_F3_MIC      | 58.9               | 11.7                            | 218                  | 11547611          | 75.64%                            | 9.58%               | low cDNA library                                                               |
| C8_Y_F4_MIC      | 89.4               | 20.2                            | 871                  | 9035937           | 73.94%                            | 11.86%              | behavior/histogram                                                             |
| C8_Y_F5_MIC      | 67.3               | 13.7                            | 947                  | 9727757           | 80.05%                            | 6.96%               |                                                                                |
| C8_Y_F6_MIC      | 81.2               | 10.8                            | 583                  | 9057911           | 75.85%                            | 10.83%              | low cDNA library                                                               |
| C8_Y_F7_MIC      | 90.2               | 14.9                            | 1640                 | 10026388          | 79.15%                            | 7.60%               |                                                                                |
| CD11cC8_Y_F1_MIC | 227.5              | 106.4                           | 72.1                 | 5787773           | 64.70%                            | 21.37%              | sorter error/ low cDNA library/ low read count/ 64% alignment/ high % unmapped |
| CD11cC8_Y_F2_MIC | 176.2              | 75.4                            | 1260                 | 10689194          | 74.43%                            | 12.21%              |                                                                                |
| CD11cC8_Y_F3_MIC | 126.8              | 37                              | 1670                 | 7789190           | 80.57%                            | 5.67%               |                                                                                |
| CD11cC8_Y_F4_MIC | 270.6              | 119.1                           | 2130                 | 10037007          | 79.00%                            | 7.20%               |                                                                                |
| CD11cC8_Y_F5_MIC | 222.1              | 100.1                           | 1640                 | 9505555           | 80.11%                            | 6.14%               |                                                                                |

**Supplemental Figure 14. Parameters for microglia (11-12-month-old) sample exclusion.**

| Sample           | Spleen Weight (mg) | Cervical Lymph Node Weight (mg) | cDNA library (pg/mL) | # Untrimmed Reads | %                                 |                     | Reason for Exclusion                                                  |
|------------------|--------------------|---------------------------------|----------------------|-------------------|-----------------------------------|---------------------|-----------------------------------------------------------------------|
|                  |                    |                                 |                      |                   | Uniquely Mapped Reads (alignment) | Unmapped: Too Short |                                                                       |
| C8_O_F1_MIC      | 77.3               | 15.4                            | 1150                 | 9168109           | 80.83%                            | 5.84%               |                                                                       |
| C8_O_F2_MIC      | 76.3               | 14.3                            | 1810                 | 10337191          | 80.21%                            | 6.66%               |                                                                       |
| C8_O_F3_MIC      | 75.3               | 13                              | 1150                 | 9483528           | 80.11%                            | 6.52%               |                                                                       |
| C8_O_F4_MIC      | 83.7               | 17.9                            | 522                  | 8872189           | 76.04%                            | 10.79%              | low cDNA library/ histogram                                           |
| C8_O_F5_MIC      | 73.3               | 18.3                            | 1640                 | 7796155           | 79.50%                            | 7.20%               |                                                                       |
| C8_O_F6_MIC      | 68.7               | 13.4                            | 854                  | 9740996           | 61.53%                            | 27.08%              | behavior/ sorter error/ 61% alignment/ high % unmapped                |
| C8_O_F7_MIC      | 99                 | 15.5                            | 387                  | 10432666          | 75.03%                            | 11.19%              | mouse (high spleen and cervical lymph node weights)/ low cDNA library |
| CD11cC8_O_F1_MIC | 171.9              | 204.5                           | 1620                 | 8943289           | 79.76%                            | 6.93%               |                                                                       |
| CD11cC8_O_F2_MIC | 147.2              | 38.6                            | 1400                 | 8077132           | 80.03%                            | 6.41%               | mouse (low spleen and cervical lymph node weights)/ histogram         |
| CD11cC8_O_F3_MIC | 380                | 301.4                           | 832                  | 10015574          | 77.71%                            | 8.78%               |                                                                       |
| CD11cC8_O_F4_MIC | 223.7              | 168.1                           | 696                  | 11064475          | 78.94%                            | 7.34%               |                                                                       |
| CD11cC8_O_F5_MIC | 114                | 111.8                           | 646                  | 10642333          | 77.31%                            | 8.74%               |                                                                       |

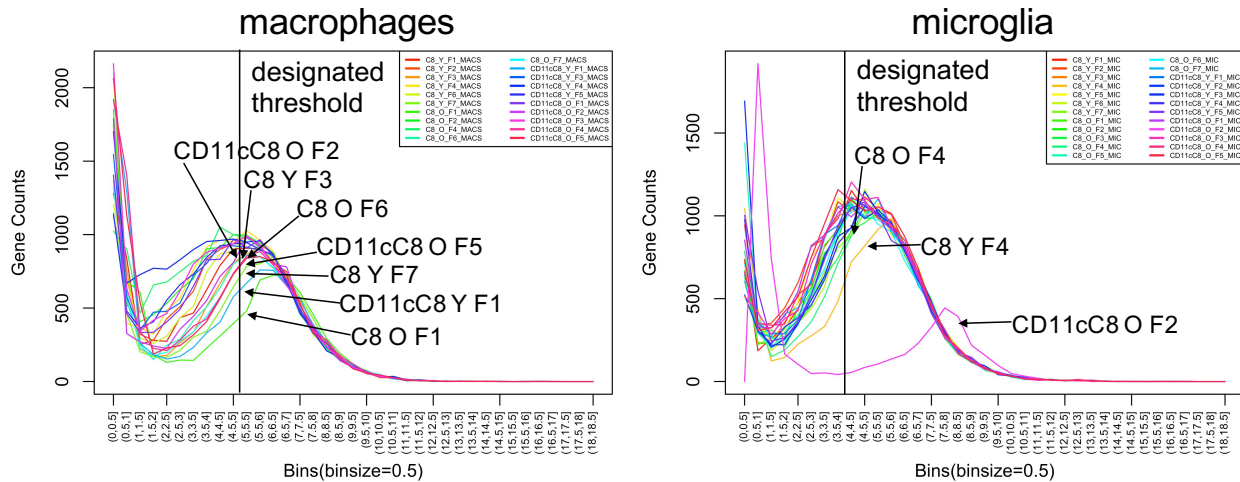

**Supplemental Figure 15. Histogram for RNA-seq sample quality check.** RNA was extracted from FACS-purified macrophages and microglia of 5-6-month-old and 11-12-month-old WT and CReCOM mice. Following RNA extraction, cDNA library preparation, and sequencing, demultiplexed reads were converted into CPM and frequencies of genes at incremental expression levels were determined and depicted in histogram form. Vertical black lines on frequency polygons indicate designated thresholds determined for minimum gene expression level in both populations.
